# Supplementary material for: The relative importance of work-related and non-work-related stressors and perceived social support on perceived stress in a cross-sectional population-based sample
Source: Research Square preprint supplement (doi:10.21203/rs.3.rs-114221/v1), 2020-12-01
Supplement: Supplementary file 1 [file 6a9432a4f6225a51b692acbe.docx]

Table 1. Characteristics of respondents with perceived stress scale (PSS) score (N=31,025).

|  | **PSS mean (SD)** | **N** | **%a** |
| --- | --- | --- | --- |
| **All** | 12.2 (7.2) | 31,025 | --- |
|  |  |  |  |
| **Gender** |  |  |  |
| Men | 11.4 (6.7) | 14,447 | 49.7 |
| Women | 13.1 (7.6) | 16,578 | 50.3 |
|  |  |  |  |
| **Age** |  |  |  |
| 16-24 | 14.2 (6.5) | 3,505 | 14.8 |
| 25-64 | 12.2 (7.2) | 19,122 | 62.7 |
| ≥65 | 11.2 (7.5) | 8,398 | 22.5 |
|  |  |  |  |
| **Ethnic background** |  |  |  |
| Danish | 12.0 (7.4) | 29,271 | 89.9 |
| Other Westernb | 13.4 (5.3) | 784 | 4.2 |
| Non-Westernc | 15.6 (5.2) | 970 | 5.9 |
|  |  |  |  |
| **Educational attainment** |  |  |  |
| Low (0-10 years) | 14.4 (7.4) | 4,437 | 15.2 |
| Medium (11-15 years) | 12.0 (7.3) | 16,923 | 51.8 |
| High (15- years) | 11.2 (6.6) | 8,497 | 28.3 |
| Unknown | 14.5 (6.5) | 1,168 | 4.7 |
|  |  |  |  |
| **Employment status** | | | |
| Students | 13.7 (6.2) | 2,546 | 11.2 |
| Employed | 11.1 (6.7) | 16,288 | 51.1 |
| Unemployed | 15.9 (7.2) | 539 | 2.0 |
| Cash or sickness benefits, etc. | 17.9 (7.8) | 1,414 | 5.6 |
| Disability pension | 17.8 (7.0) | 1,086 | 4.1 |
| Early retirement pension | 9.7 (7.0) | 730 | 2.0 |
| Retirement pension | 11.4 (7.4) | 7,576 | 20.7 |
| Unknown | 13.7 (6.6) | 846 | 3.3 |

a Weighted percentage. b Other Western countries: all 27 EU countries, Andorra, Iceland, Liechtenstein, Monaco, Norway, San Marino, Switzerland, Vatican State, Canada, USA, UK, Australia and New Zealand. c Non-Western: all other countries.

Table 2. Prevalence of stressors and perceived social support (N=30,261).

|  |  | **N** | **%a** |
| --- | --- | --- | --- |
| **Financial circumstances** |  |  |  |
| No |  | 19,120 | 58.9 |
| Yes, a little |  | 7,121 | 25.2 |
| Yes, partly |  | 2,305 | 9.0 |
| Yes, a lot |  | 1,715 | 6.9 |
|  |  |  |  |
| **Housing conditionsb** |  |  |  |
| No |  | 24,527 | 77.2 |
| Yes, a little |  | 3,616 | 13.8 |
| Yes, partly |  | 1,279 | 5.3 |
| Yes, a lot |  | 838 | 3.6 |
|  |  |  |  |
| **Work situation** |  |  |  |
| No |  | 18,923 | 59.8 |
| Yes, a little |  | 6,587 | 22.9 |
| Yes, partly |  | 2,708 | 9.7 |
| Yes, a lot |  | 2,040 | 7.7 |
|  |  |  |  |
| **Relationship with partner** |  |  |  |
| No |  | 22,927 | 75.1 |
| Yes, a little |  | 5,196 | 17.1 |
| Yes, partly |  | 1,366 | 4.9 |
| Yes, a lot |  | 768 | 3.0 |
|  |  |  |  |
| **Relationship with family and friends** | |  |  |
| No |  | 22,639 | 72.9 |
| Yes, a little |  | 6,030 | 21.1 |
| Yes, partly |  | 1,174 | 4.4 |
| Yes, a lot |  | 413 | 1.7 |
|  |  |  |  |
| **Disease** |  |  |  |
| No |  | 17,252 | 57.8 |
| Yes, a little |  | 7,781 | 24.7 |
| Yes, partly |  | 3,151 | 10.4 |
| Yes, a lot |  | 2,072 | 7.1 |
|  |  |  |  |
| **Disease among close relatives** |  |  |  |
| No |  | 17,853 | 60.4 |
| Yes, a little |  | 8,127 | 25.7 |
| Yes, partly |  | 2,842 | 9.1 |
| Yes, a lot |  | 1,435 | 4.7 |
|  |  |  |  |
| **Deaths among close relatives** |  |  |  |
| No |  | 24,581 | 81.2 |
| Yes, a little |  | 3,235 | 10.6 |
| Yes, partly |  | 1,293 | 4.3 |
| Yes, a lot |  | 1,152 | 3.9 |
|  |  |  |  |
| **Other types of distress** |  |  |  |
| No |  | 26,531 | 87.0 |
| Yes, a little |  | 1,913 | 6.4 |
| Yes, partly |  | 1,004 | 3.6 |
| Yes, a lot |  | 812 | 3.0 |
|  |  |  |  |
| **Perceived social support** |  |  |  |
| Yes, always |  | 18,374 | 59.2 |
| Yes, mostly |  | 7,707 | 25.8 |
| Yes, sometimes |  | 2,825 | 10.1 |
| No, never or almost never |  | 1,334 | 4.9 |

a Weighted percentage.

Table 3. Unadjusted and adjusted dominance analyses for all respondents and subgroups stratified by gender, age, educational attainment and employment status (N=29,860). Predictors contributing with more than 10% of the adjusted R2 are stated in bold.

|  | **Unadjusted R2** | **Adjusted R2** | **Adjusted rank and R2 of stressors and perceived social support** | | |
| --- | --- | --- | --- | --- | --- |
| **Alla** | 38.7%  (N=29,860) | 42.5%  (N=29,541) | 1. **Disease (9.5%)** 2. **Perceived social support (5.9%)** 3. **Work situation (4.9%)** 4. Relationship with family and friends (4.1%) 5. Financial circumstances (3.2%) | 1. Other types of distress (2.3%) 2. Relationship with partner (1.9%) 3. Housing conditions (1.8%) 4. Disease among close relatives (1.3%) 5. Deaths among close relatives (0.5%) | |
|  |  |  |  | | |
| **Genderb** |  |  |  | | |
| Men | 39.1%  (N=13,903) | 41.9%  (N=13,770) | 1. **Disease (10.0%)** 2. **Perceived social support (5.9%)** 3. **Work situation (5.4%)** 4. Relationship with family and friends (4.0%) 5. Financial circumstances (3.2%) | 1. Other types of distress (2.3%) 2. Housing conditions (2.2%) 3. Relationship with partner (1.9%) 4. Disease among close relatives (1.3%) 5. Deaths among close relatives (0.5%) | |
|  |  |  |  |  | |
| Women | 38.2%  (N=15,957) | 42.1%  (N=15,771) | 1. **Disease (9.2%)** 2. **Perceived social support (6.0%)** 3. **Work situation (4.6%)** 4. **Relationship with family and friends (4.2%)** 5. Financial circumstances (3.2%) | 1. Other types of distress (2.5%) 2. Relationship with partner (1.9%) 3. Housing conditions (1.6%) 4. Disease among close relatives (1.4%) 5. Deaths among close relatives (0.5%) | |
|  |  |  |  | | |
| **Agec** |  |  |  | | |
| 16-24 | 38.4%  (N=3,302) | 42.8%  (N=3,272) | 1. **Disease (6.7%)** 2. **Relationship with family and friends (6.3%)** 3. **Perceived social support (5.3%)** 4. Work situation (3.6%) 5. Financial circumstances (3.6%) | 1. Other types of distress (3.0%) 2. Housing conditions (1.9%) 3. Relationship with partner (1.5%) 4. Disease among close relatives (1.2%) 5. Deaths among close relatives (0.1%) | |
|  |  |  |  |  | |
| 25-64 | 43.1%  (N=18,447) | 44.8%  (N=18,271) | 1. **Disease (10.0%)** 2. **Work situation (6.9%)** 3. **Perceived social support (6.4%)** 4. Relationship with family and friends (4.0%) 5. Financial circumstances (3.8%) | 1. Other types of distress (2.6%) 2. Housing conditions (2.1%) 3. Relationship with partner (2.1%) 4. Disease among close relatives (1.3%) 5. Deaths among close relatives (0.5%) | |
|  |  |  |  |  | |
| ≥65 | 29.3%  (N=8,111) | 34.0%  (N=7,998) | 1. **Disease (10.9%)** 2. **Perceived social support (5.4%)** 3. Relationship with family and friends (3.0%) 4. Relationship with partner (2.1%) 5. Disease among close relatives (1.6%) | 1. Other types of distress (1.3%) 2. Financial circumstances (1.2%) 3. Housing conditions (1.1%) 4. Deaths among close relatives (0.8%) 5. Work situation (0.3%) | |
|  | | | | | |
| **Educational attainmentd** | | | | | |
| Low | 36.6%  (N=4,337) | 38.7%  (N=4,337) | 1. **Disease (10.2%)** 2. **Perceived social support (5.6%)** 3. Relationship with family and friends (3.7%) 4. Financial circumstances (2.6%) 5. Other types of distress (2.4%) | 1. Work situation (2.0%) 2. Relationship with partner (1.8%) 3. Disease among close relatives (1.6%) 4. Housing conditions (1.6%) 5. Deaths among close relatives (0.7%) | |
|  |  |  |  |  | |
| Medium | 40.3%  (N=16,766) | 42.6%  (N=16,766) | 1. **Disease (10.3%)** 2. **Perceived social support (6.5%)** 3. **Work situation (5.0%)** 4. Relationship with family and friends (4.2%) 5. Financial circumstances (3.6%) | 1. Other types of distress (2.1%) 2. Relationship with partner (1.9%) 3. Housing conditions (1.9%) 4. Disease among close relatives (1.3%) 5. Deaths among close relatives (0.5%) | |
|  |  |  |  |  | |
| High | 39.8%  (N=8,438) | 41.9%  (N=8,438) | 1. **Disease (8.2%)** 2. **Work situation (7.4%)** 3. **Perceived social support (5.1%)** 4. Relationship with family and friends (4.5%) 5. Financial circumstances (3.2%) | 1. Other types of distress (3.0%) 2. Relationship with partner (2.0%) 3. Housing conditions (2.0%) 4. Disease among close relatives (1.4%) 5. Deaths among close relatives (0.3%) | |
|  |  |  |  | | |
| **Employment statusa** | | | | | |
| Students | 37.0%  (N=2,535) | 41.6%  (N=2,526) | 1. **Disease (6.8%)** 2. **Perceived social support (6.0%)** 3. **Relationship with family and friends (6.0%)** 4. **Financial circumstances (4.3%)** 5. Work situation (3.4%) | 1. Other types of distress (3.3%) 2. Housing conditions (1.7%) 3. Relationship with partner (1.7%) 4. Disease among close relatives (0.8%) 5. Deaths among close relatives (0.4%) |
|  |  |  |  |  |
| Employed | 36.1%  (N=16,167) | 38.4%  (N=16,068) | 1. **Work situation (9.0%)** 2. **Perceived social support (6.1%)** 3. **Disease (6.0%)** 4. Relationship with family and friends (3.2%) 5. Relationship with partner (2.5%) | 1. Financial circumstances (2.3%) 2. Other types of distress (1.9%) 3. Housing conditions (1.5%) 4. Disease among close relatives (1.4%) 5. Deaths among close relatives (0.2%) |
|  |  |  |  |  |
| Unemployed | 43.6%  (N=539) | 46.1%  (N=536) | 1. **Disease (10.2%)** 2. **Work situation (7.1%)** 3. **Financial circumstances (5.4%)** 4. **Relationship with family and friends (4.7%)** 5. Perceived social support (4.2%) | 1. Relationship with partner (2.7%) 2. Housing conditions (2.5%) 3. Other types of distress (1.4%) 4. Disease among close relatives (0.7%) 5. Deaths among close relatives (0.4%) |
|  |  |  |  |  |
| Cash or sickness benefits | 47.2%  (N=1,401) | 51.8%  (N=1,362) | 1. **Disease (13.8%)** 2. **Relationship with family and friends (6.2%)** 3. **Financial circumstances (5.3%)** 4. Perceived social support (4.4%) 5. Other types of distress (3.8%) | 1. Work situation (3.3%) 2. Housing conditions (2.4%) 3. Disease among close relatives (2.1%) 4. Relationship with partner (1.4%) 5. Deaths among close relatives (0.4%) |
|  |  |  |  |  |
| Disability pension | 38.7%  (N=1,029) | 42.6%  (N=986) | 1. **Disease (8.4%)** 2. **Perceived social support (6.8%)** 3. **Relationship with family and friends (5.8%)** 4. Other types of distress (3.2%) 5. Financial circumstances (3.0%) | 1. Housing conditions (2.6%) 2. Deaths among close relatives (2.1%) 3. Disease among close relatives (1.9%) 4. Relationship with partner (1.5%) 5. Work situation (1.4%) |
|  |  |  |  |  |
| Early retirement pension | 41.4%  (N=714) | 43.9%  (N=712) | 1. **Disease (11.7%)** 2. **Perceived social support (9.6%)** 3. **Relationship with family and friends (4.9%)** 4. Housing conditions (2.9%) 5. Financial circumstances (2.9%) | 1. Other types of distress (2.2%) 2. Work situation (2.0%) 3. Relationship with partner (1.4%) 4. Disease among close relatives (1.3%) 5. Deaths among close relatives (1.2%) |
|  |  |  |  |  |
| Retirement pension | 29.6%  (N=7,299) | 33.3%  (N=7,187) | 1. **Disease (11.0%)** 2. **Perceived social support (5.6%)** 3. Relationship with family and friends (3.2%) 4. Relationship with partner (2.4%) 5. Disease among close relatives (1.6%) | 1. Other types of distress (1.4%) 2. Financial circumstances (1.2%) 3. Housing conditions (1.2%) 4. Deaths among close relatives (0.8%) 5. Work situation (0.2%) |

a Adjusted for gender, age, ethnic background and educational attainment. b Adjusted for age, ethnic background and educational attainment. c Adjusted for gender, ethnic background and educational attainment. d Adjusted for gender, age and ethnic background.
